# Supplementary material for: Coiled flow inverter mediated synthesis of activated carbon fiber-supported Ni nanoparticles
Source: Royal Society of Chemistry journal article supplement (doi:10.1039/d1re00338k), 2021-12-02
Supplement: d1re00338k1.pdf [file d1re00338k1.pdf]

## SUPPLEMENTARY DATA

### **Coiled Flow Inverter Mediated Synthesis of Activated Carbon Fibers-Supported Ni Nanoparticles**

Amol Pophali <sup>a</sup>, Rakshit Kajala <sup>a</sup>, Haider Ali<sup>a</sup>, Nishith Verma <sup>a,b,\*</sup>, K.D.P. Nigam <sup>c,\*</sup>,

*<sup>a</sup>Department of Chemical Engineering, Indian Institute of Technology Kanpur, Kanpur 208016, India*

*<sup>b</sup>Centre for Environmental Science and Engineering, Indian Institute of Technology Kanpur, Kanpur 208016, India*

*<sup>c</sup>Department of Chemical Engineering, Indian Institute of Technology Delhi, Hauz Khas, New Delhi 110016, India*

\*Corresponding authors

Prof. Nishith Verma; email id: [vermanishith@gmail.com](mailto:vermanishith@gmail.com) ; [nishith@iitk.ac.in](mailto:nishith@iitk.ac.in)

Prof. K.D.P. Nigam; email id: [nigamkdp@gmail.com](mailto:nigamkdp@gmail.com)

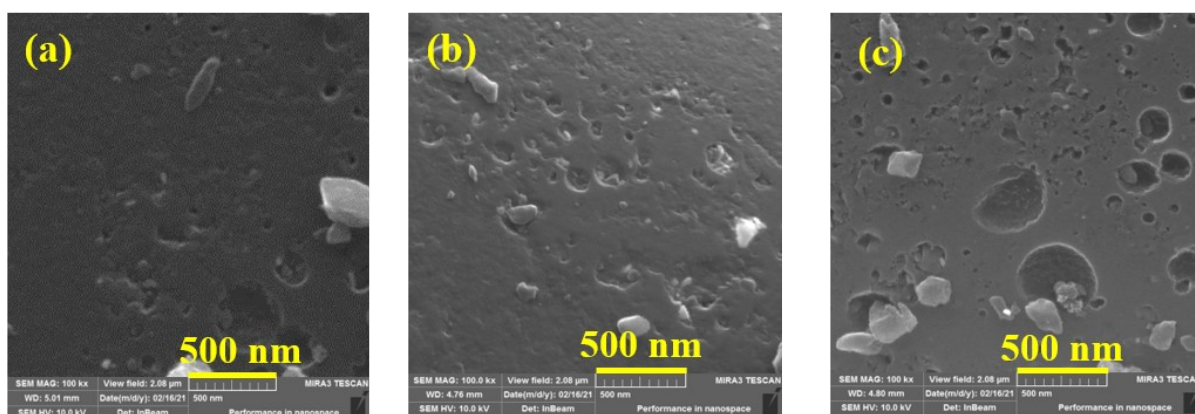

**Fig. S1:** SEM images of  $\text{NiCl}_2/\text{ACF}$  samples synthesized at a mixed flowrate of 100 cc/min with a fixed Ni-salt concentration of 0.5 M and different ACF dosages : (a) 1.5, (b) 1.75, and (c) 2 g/100 mL

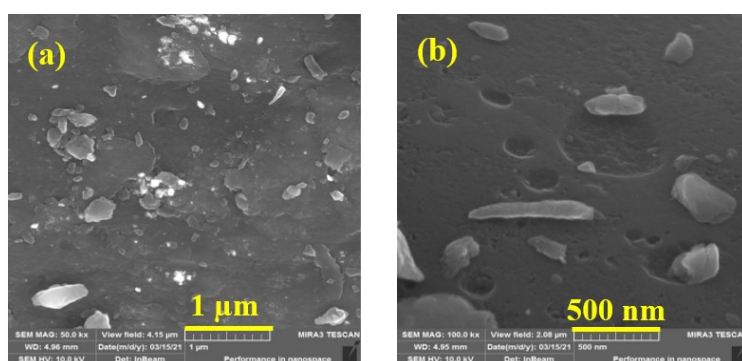

**Fig. S2:** SEM images of  $\text{NiCl}_2/\text{ACF}$  samples synthesized at mixed flowrate of 200 cc/min with Ni-salt concentration of 0.7 M and an ACF dose of 2 g/100 mL.

**Table S1**

Comparative analysis of CNFs/CNTs synthesized via the catalytic decomposition of C<sub>2</sub>H<sub>2</sub> over supported Ni catalysts

| S. No. | Substrate              | Temperature (°C) | Time (h) | Yield (mg/g) | Average diameter of CNFs/CNTs (nm) | Ref.    |
|--------|------------------------|------------------|----------|--------------|------------------------------------|---------|
| 1      | ACF                    | 600              | 1.0      | 240          | 40 - 50                            | Current |
| 2      | ACF                    | 600              | 2.0      | 200          | 30 - 40                            | 49      |
| 3      | ACF                    | 600              | 2.0      | -            | ~ 30                               | 53      |
| 4      | Alumina                | 500              | 1.0      | 215          | -                                  | 54      |
| 5      | Silica                 | 500              | 1.0      | ~ 0          | -                                  | 54      |
| 6      | Alumina                | 600              | 0.5      | -            | 60 - 80                            | 55      |
| 7      | ACF                    | 550 - 850        | 1.0      | -            | ~15                                | 56      |
| 8      | Sputtered Ni-thin film | 650              | 0.5      | -            | 50 - 100                           | 57      |
